# Supplementary material for: Controlled exfoliation of monodispersed MoS2 layered nanostructures by a ligand-assisted hydrothermal approach for the realization of ultrafast degradation of an organic pollutant
Source: Royal Society of Chemistry journal article supplement (doi:10.1039/c6ra24355j), 2016-01-01
Supplement: c6ra24355j1.pdf [file c6ra24355j1.pdf]

## Supplementary Information

**Controlled exfoliation of monodispersed MoS<sub>2</sub> layered nanostructures by  
ligand-assisted hydrothermal approach for the realization of ultrafast degradation  
of organic pollutant**

**M. Sabarinathan<sup>a</sup>, S. Harish<sup>a</sup>, J. Archana<sup>c</sup>, M. Navaneethan<sup>b\*</sup>, H. Ikeda<sup>b</sup>,**

**Y. Hayakawa<sup>a,b\*</sup>**

*<sup>a</sup>Graduate School of Science and Technology, Shizuoka University, 3-5-1 Johoku,  
Naka-ku, Hamamatsu, Shizuoka 432-8011, Japan.*

*<sup>b</sup>Research Institute of Electronics, Shizuoka University, 3-5-1 Johoku, Naka-ku,  
Hamamatsu, Shizuoka 432-8011, Japan.*

*<sup>c</sup>Department of Physics and Nanotechnology, SRM Research Institute, SRM University,  
Kattankulathur, Chennai, 603203, Tamilnadu, India.*

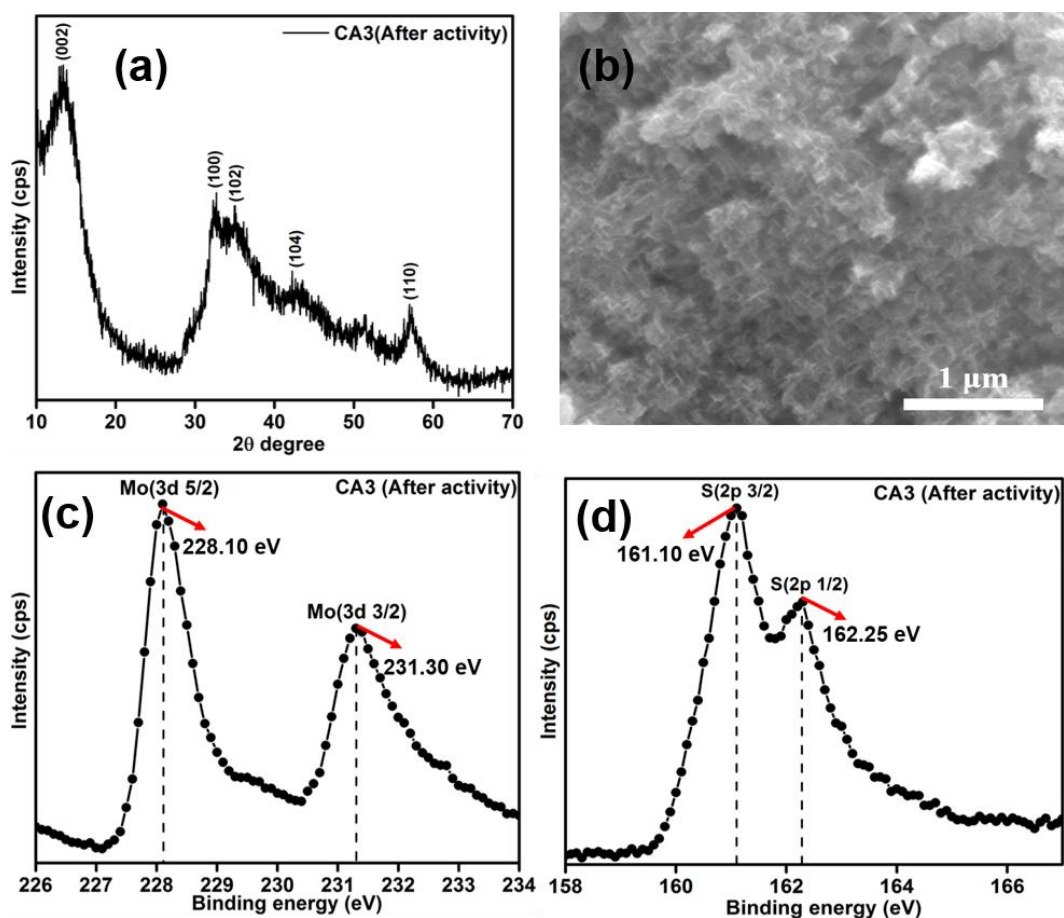

Fig. S1. XRD spectra (a), FESEM (c) and XPS spectra of (c) Mo 3d state, (d) S

2p state of sample CA3 after photocatalytic reaction.

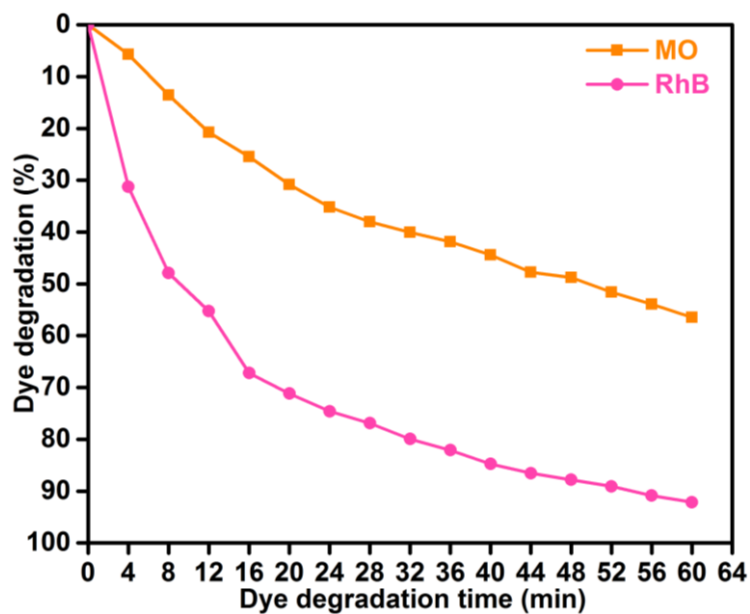

Fig. S2 Photocatalytic degradation of sample CA3 on MO and RhB
